# Supplementary material for: Titin-Related Dilated Cardiomyopathy: The Sequence of Events and The Role of Circulating Biomarkers in The Clinical Assessment
Source: Research Square preprint supplement (doi:10.21203/rs.3.rs-692235/v1), 2021-07-09
Supplement: Supplementary file 1 [file c6d98ed60c9b77795d8905f0.docx]

Supplementary Table S1. Titin truncating variants identified in the study cohort

|  | **Metatranscript NM_001267550.2** | **Protein NP_001254479.2** | ***TTN* variant type** | **Exon metatranscript** | **Band** | **PSI** | **No. of probands / relatives** |
| --- | --- | --- | --- | --- | --- | --- | --- |
| 1 | c.414C>A n | p.Tyr138Ter | nonsense | 4 | Z-disc | 1.00 | 1/2 |
| 2 | c.1478C>A # | p.Ser493Ter | nonsense | 9 | Z-disc | 1.00 | 1/8 |
| 3 | c.12704C>A | p.Ser4235Ter | nonsense | 48 | I-band | 1.00 | 1/0 |
| 4 | c.13058delC | p.Pro4353GlnfsTer14 | frameshift | 48 | I-band | 1.00 | 1/2 |
| 5 | c.41923dup n | p.Thr13975AsnfsTer4 | frameshift | 228 | I-band | 1.00 | 1/1 |
| 6 | c.43360G>T | p.Glu14454Ter | nonsense | 235 | I-band | 1.00 | 1/2 |
| 7 | c.43582A>T # | p.Lys14528Ter | nonsense | 236 | I-band | 1.00 | 1/1 |
| 8 | c.44146dup n | p.Gln14716ProfsTer4 | frameshift | 238 | I-band | 1.00 | 1/0 |
| 9 | c.44249del n | p.Asn14750MetfsTer14 | frameshift | 239 | I-band | 1.00 | 1/0 |
| 10 | c.44281+1G>A | n/a | splice site | 239 near | I-band | 1.00 | 1/1 |
| 11 | c.44410G>T n | p.Glu14804Ter | nonsense | 240 | I-band | 1.00 | 1/0 |
| 12 | c.47192del n | p.Arg15731LeufsTer2 | frameshift | 252 | A-band | 1.00 | 1/0 |
| 13 | c.50083C>T | p.Arg16695Ter | nonsense | 240 | I-band | 1.00 | 1/1 |
| 14 | c.53206C>T # | p.Arg17736Ter | nonsense | 277 | A-band | 1.00 | 1/1 |
| 15 | c.53259del | p.Lys17753AsnfsTer7 | frameshift | 277 | A-band | 1.00 | 1/0 |
| 16 | c.54652C>T n | p.Arg18218Ter | nonsense | 282 | A-band | 1.00 | 2/2 |
| 17 | c.56751_56752del # | p.Gly18918ValfsTer17 | frameshift | 291 | A-band | 1.00 | 1/2 |
| 18 | c.57769C>T | p.Arg19257Ter | nonsense | 295 | A-band | 1.00 | 1/2 |
| 19 | c.61197_61198insAT n | p.Gly20400MetfsTer6 | frameshift | 304 | A-band | 1.00 | 1/2 |
| 20 | c.62337_62340del n | p.Thr20780SerfsTer32 | frameshift | 304 | A-band | 1.00 | 1/0 |
| 21 | c.63025C>T # | p.Arg21009Ter | nonsense | 304 | A-band | 1.00 | 1/4 |
| 22 | c.64473T>A * | p.Tyr21491Ter | nonsense | 309 | A-band | 1.00 | 1/0 |
| 23 | c.68449C>T # | p.Arg22817Ter | nonsense | 322 | A-band | 1.00 | 1/2 |
| 24 | c.70496dup | p.Leu23499PhefsTer3 | frameshift | 326 | A-band | 1.00 | 1/1 |
| 25 | c.70540G>T # | p.Glu23514Ter | nonsense | 326 | A-band | 1.00 | 1/0 |
| 26 | c.73508del | p.Asn24503IlefsTer24 | frameshift | 326 | A-band | 1.00 | 1/0 |
| 27 | c.73734_73735insCCAC n | p.Lys24579ProfsTer11 | frameshift | 326 | A-band | 1.00 | 1/1 |
| 28 | c.78439C>T * # | p.Gln26147Ter | nonsense | 326 | A-band | 1.00 | 1/0 |
| 29 | c.78979C>T | p.Arg26327Ter | nonsense | 326 | A-band | 1.00 | 1/2 |
| 30 | c.80487delT # | p.Ile26829MetfsTer15 | frameshift | 326 | A-band | 1.00 | 1/2 |
| 31 | c.81010C>T # | p.Gln27004Ter | nonsense | 326 | A-band | 1.00 | 1/5 |
| 32 | c.81391A>T # | p.Lys27131Ter | nonsense | 326 | A-band | 1.00 | 1/0 |
| 33 | c.84504dup | p.Ser28169IlefsTer12 | frameshift | 326 | A-band | 1.00 | 1/2 |
| 34 | c.85408_85409delCT * n | p.Leu28470PhefsTer22 | frameshift | 326 | A-band | 1.00 | 1/2 |
| 35 | c.86076dup # | p.Ser28693IlefsTer2 | frameshift | 326 | A-band | 1.00 | 1/1 |
| 36 | c.87355delG # | p.Ala29119LeufsTer17 | frameshift | 328 | A-band | 1.00 | 4/4 |
| 37 | c.87757del # | p.Ser29253AlafsTer18 | frameshift | 329 | A-band | 1.00 | 1/1 |
| 38 | c.88703_88704del | p.His29568LeufsTer7 | frameshift | 332 | A-band | 1.00 | 1/4 |
| 39 | c.92199dup # | p.Asn30734GlnfsTer17 | frameshift | 339 | A-band | 1.00 | 1/3 |
| 40 | c.93166C>T # | p.Arg31056Ter | nonsense | 340 | A-band | 1.00 | 2/5 |
| 41 | c.101227C>T | p.Arg33743Ter | nonsense | 358 | M-band | 1.00 | 1/2 |

Legend: PSI , proportion spliced-in index is the proportion of transcripts that include a given exon of *TTN,* reflecting the exon usage in human LV 6. *, carriers of these variants were excluded from the study due to concomitant likely pathogenic variants in other DCM-related genes; #, variants described by us in 3; n, novel variants.

Supplementary Table S2. Likely pathogenic variants identified in other DCM-related genes in the cohort of titin truncating variant carriers.

| Gene | Variant |
| --- | --- |
| *MYH7* | NM_000257.3: c.709C>T(p.Arg237Trp) |
| *SCN5A* | NM_198056.3:c.5527G>T(p.Val1843Leu) |
| *TNNT2* | NM_001001430.2: c.133G>A(p.Glu45Lys) |

Legend: ACMG classification, American College of Medical Genetics and Genomics classification.

Supplementary Table S3. Additional Baseline Clinical Characteristics of *TTN* Variant Carriers at Initial Visit.

|  | All N= 108 | Probands  N=43 (39.8%) | Relatives  N=65 (60.2%) | p | Men  N=67 (62.0%) | Women  N= 41 (38.0%) | p |
| --- | --- | --- | --- | --- | --- | --- | --- |
| Risk factors |  | | | |  | | |
| Alcohol abuse, n=101 | 6 (5.9%) | 2 (4.9%) | 4 (6.7%) | 1.00 | 6 (9.5%) | 0 (0%) | 0.081 |
| Chemotherapy | 0 | 0 | 0 | 1.00 | 0 | 0 | 1.00 |
| Obesity | 25 (23.1%) | 14 (32.6%) | 11 (16.9%) | 0.059 | 16 (23.9%) | 9 (21.9%) | 0.817 |
| Comorbidities |  | | | |  | | |
| Coronary artery disease | 5 (4.6%) | 3 (7.0%) | 2 (3.1%) | 0.385 | 4 (6.0%) | 1 (2.4%) | 0.648 |
| Hypertension | 27 (25.0%) | 12 (27.9%) | 15 (23.1%) | 0.570 | 17 (25.4%) | 10 (24.4%) | 0.909 |
| Diabetes mellitus | 4 (3.7%) | 1 (2.3%) | 3 (4.6%) | 1.00 | 2 (3.0%) | 2 (4.9%) | 0.633 |
| Medication (n=105) |  | | | |  | | |
| β-blocker | 60 (57.1%) | 38 (92.7%) | 22 (34.4%) | **<0.001** | 40 (62.5%) | 20 (48.8%) | 0.166 |
| ACE-I or ARB | 64 (60.9%) | 39 (95.1%) | 25 (39.1%) | **<0.001** | 47 (73.4%) | 17 (41.5%) | **0.001** |
| MRA | 39 (37.1%) | 31 (75.6%) | 8 (12.5%) | **<0.001** | 28 (43.7%) | 11 (26.8%) | 0.080 |

Legend: Number of subjects is expressed as n (%). Alcohol abuse was defined as a self-reported history of daily alcohol intake of more than 2U/day over a period longer than 3 years. Obesity was defined as body mass index >30 kg/m2. ACE-I, angiotensin converting enzyme inhibitor; ARB, angiotensin receptor blocker; MRA, mineralocorticoid receptor blockers.

Supplementary Table S4. Penetrance of disease symptoms in all *TTN* truncating variant carriers (n=108).

| Disease symptom | 20y | 30y | 40y | 50y | 60y |
| --- | --- | --- | --- | --- | --- |
| LVD | 8.4% | 25.9% | 47.4% | 68.0% | 78.1% |
| severe LVSD | 3.7% | 13.3% | 31.2% | 49.6% | 63.1% |
| HF | 3.7% | 12.2% | 30.4% | 53.6% | 67.0% |
| NT-proBNP | 1.5% | 11.8% | 26.6% | 59.8% | 83.0% |
| VA | 0% | 10.2% | 26.6% | 49.8% | 67.4% |
| AA | 0.9% | 5.5% | 14.8% | 25.5% | 55.8% |
| AVB | 0% | 3.5% | 6.1% | 13.6% | 36.3% |
| MVA | 0% | 1.2% | 4.0% | 11.1% | 28.7% |
| esHF | 1.9% | 3.9% | 6.3% | 9.7% | 22.4% |
| LBBB | 0% | 0% | 2.7% | 8.6% | 25.3% |
| hs-cTnT | 0% | 1.5% | 3.4% | 5.6% | 17.0% |

Legend: AA, atrial arrhythmia; AVB, atrioventricular block; esHF, end-stage heart failure; HF, heart failure; hs-cTnT, high-sensitivity cardiac troponin T concentration >14 ng/l; LBBB, left bundle branch block; LVEF, left ventricular ejection fraction; LVD, left ventricular dysfunction; LVSD, left ventricular systolic dysfunction; MVA, malignant ventricular arrhythmia; NT-proBNP, N-terminal pro-B-type natriuretic peptide serum concentration >125 pg/ml; VA, ventricular arrhythmia.
